# Supplementary material for: HNF4α isoforms regulate the circadian balance between carbohydrate and lipid metabolism in the liver
Source: PubMed Central journal article supplement (PMC10726135; doi:10.3389/fendo.2023.1266527), 2023-12-04
Supplement: Image_1.pdf [file Image_1.pdf]

## **Supplemental Figures and Legends**

**Deans et al.**

**A**

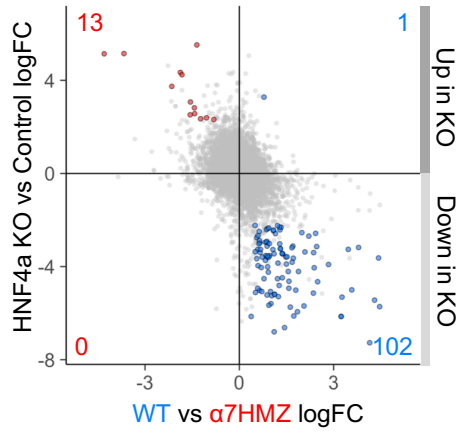

**B**

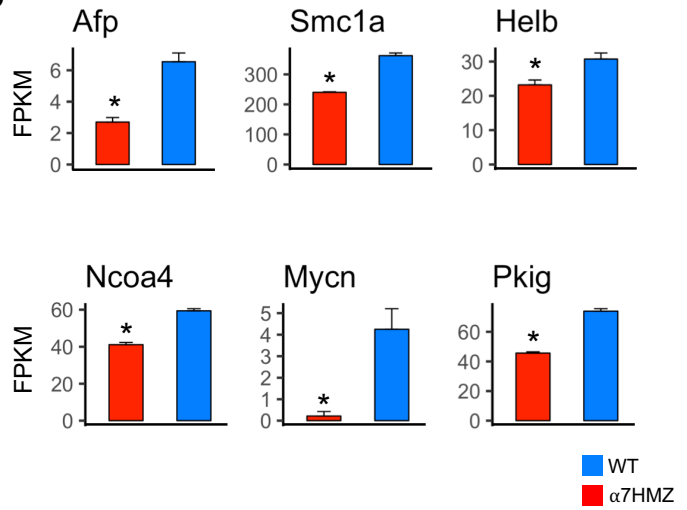

**D**

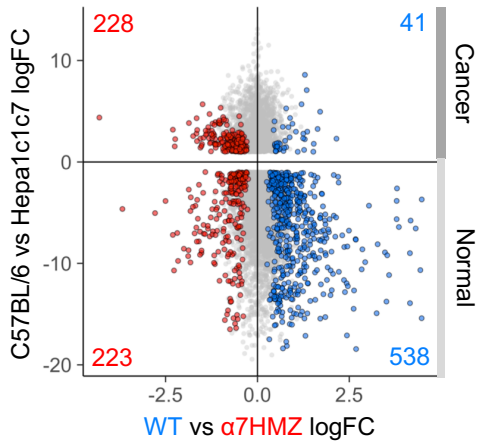

**C**

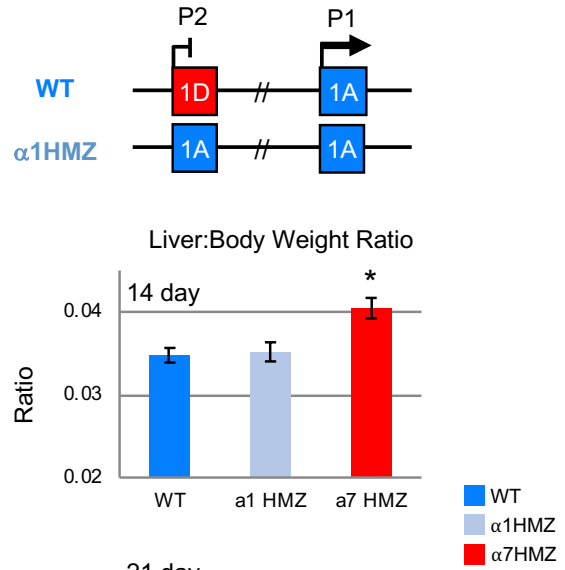

**E**

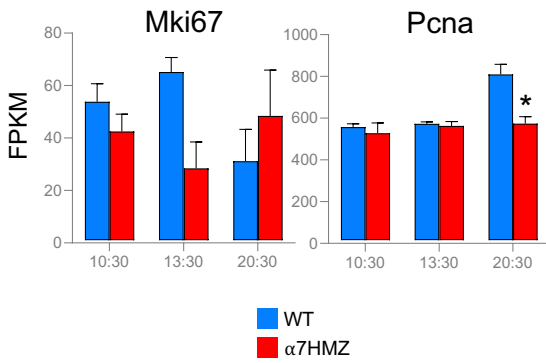

**Figure S1 for Figure 1: HNF4 $\alpha$  isoforms preferentially regulate genes in fetal liver and liver cancer.**

(A) Scatterplot of RNA-seq log<sub>2</sub> fold-change (log<sub>2</sub>FC) values between WT and  $\alpha$ 7HMZ livers, plotted versus mouse liver HNF4 $\alpha$  knockout (KO) microarray data. Colored data points with  $\text{padj} \leq 0.01$  in both datasets: blue dots, up in WT vs.  $\alpha$ 7HMZ; red dots, up in  $\alpha$ 7HMZ vs. WT. Numbers indicate highlighted genes in each quadrant. (B) FPKM barplots from RNA-seq of genes downregulated in  $\alpha$ 7HMZ, but more highly expressed in E14.5 fetal livers compared to adult. \*  $\text{padj} \leq 0.01$ . (C) Liver-to-body weight ratio of 14- and 21-day old mice (n=11 to 24). \*  $p \leq 0.01$  One-way ANOVA 14-day; #  $p \leq 0.05$  Student's T-test 21-day. (D) as in (A) except WT and  $\alpha$ 7HMZ RNA-seq plotted vs. RNA-seq from murine hepatoma cell line (Hepa1c1c7) compared to non tumorigenic C57BL/6 control. (E) FPKM barplots of proliferation genes from RNA-seq. \*  $\text{padj} \leq 0.01$ . See Table S2AC for highlighted genes in (A) and (D).

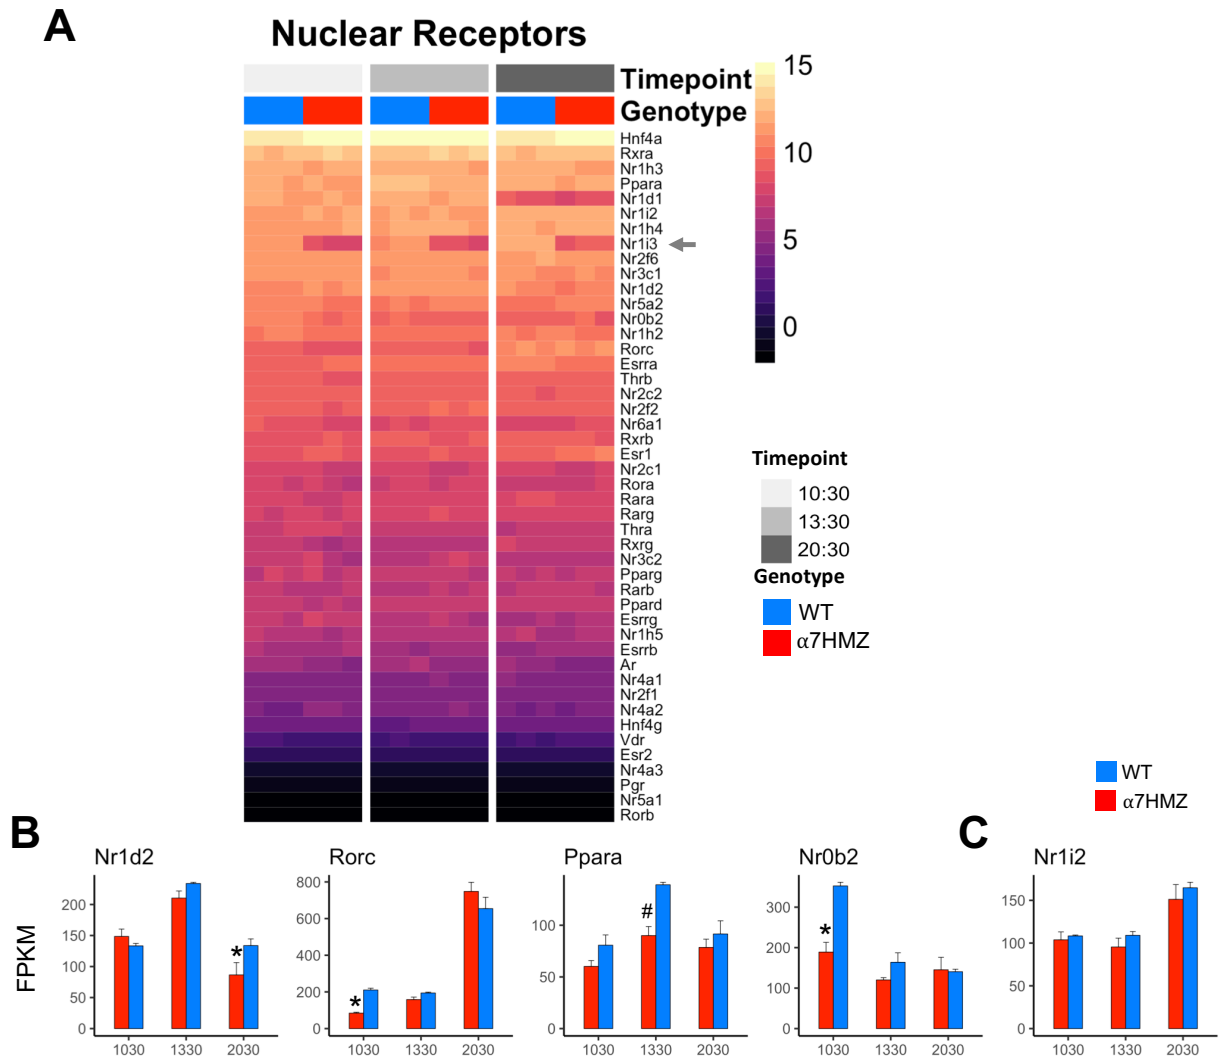

**Figure S2 for Figure 2: Dysregulation of nuclear receptors (NR) by HNF4a isoforms in the mouse liver.**

(A) Heatmap of regularized log-transformed (rlog) read counts for all NR in WT and  $\alpha$ 7HMZ males. Arrow, NR discussed in text. FPKM barplots of NR involved in the regulation of the circadian clock (B) and sex-specific expression of Cytochrome P450 genes (C) in WT and  $\alpha$ 7HMZ males. \*  $\text{padj} \leq 0.01$ ; #  $\text{padj} \leq 0.05$

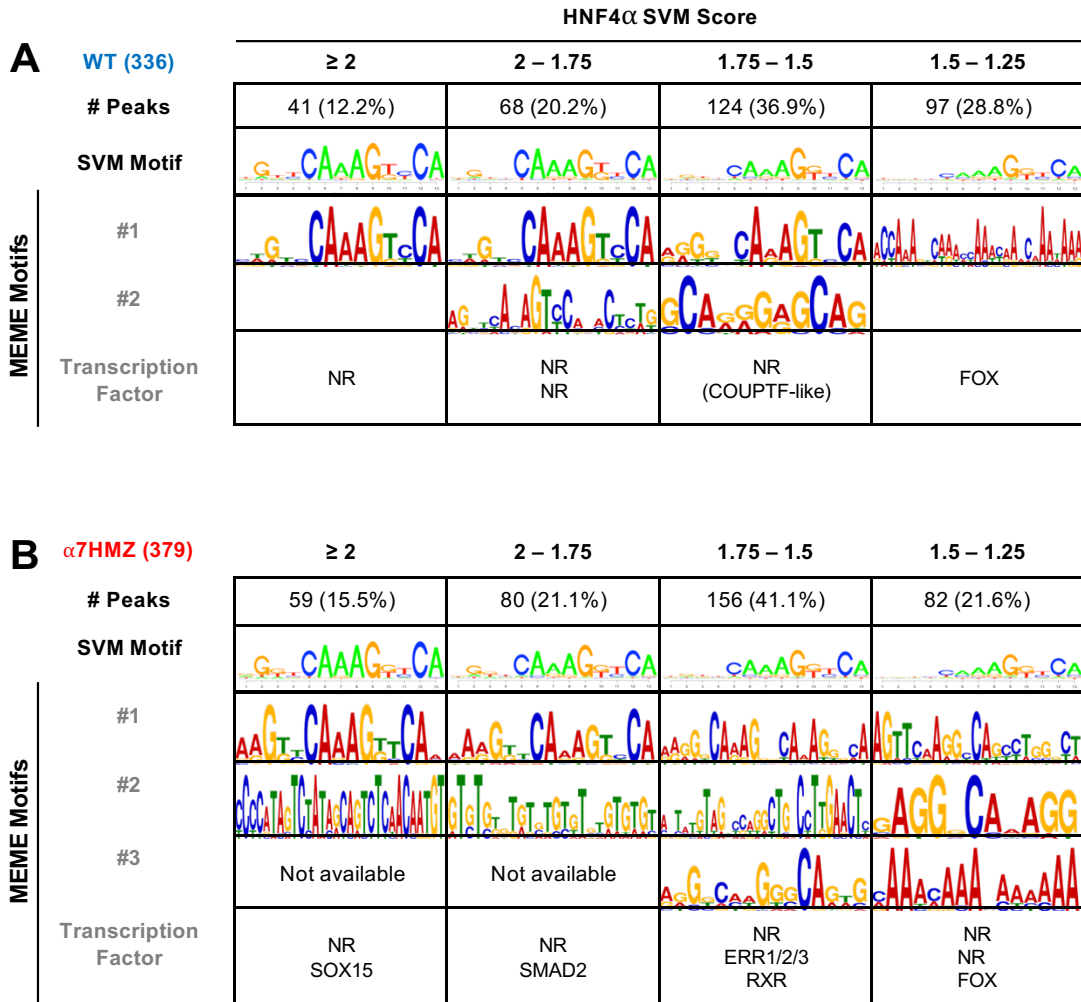

**Figure S3 for Figure 4. Motif analysis of HNF4 $\alpha$  ChIP-seq peaks categorized by HNF4 $\alpha$  motifs.**

Categorization of HNF4 $\alpha$  ChIPseq peaks unique to WT (A) and  $\alpha$ 7HMZ livers (B) into four groups based on highest SVM HNF4 $\alpha$  motif score, as indicated. Number of unique peaks for each genotype are given in parentheses. HNF4 $\alpha$  SVM-derived binding motifs are shown. Top three motifs derived from *de novo* MEME-ChIP analysis are shown with the transcription factors corresponding to the motifs listed below. NR, HNF4 $\alpha$ - like DR1 motif.



**Figure S4 for Figure 5: Examples of dysregulated genes with unique ChIP-seq peaks.**

(A) UCSC Genome Browser view of four genes specific to  $\alpha$ 7HMZ livers with respect to both expression (RNAseq) and binding (ChIP-signal within ~10 kb of TSS). ChIP-seq and uniquely bound regions are in the top two tracks; RNA-seq from 10:30 AM is in the bottom two tracks.

(B) as in (A) but of two genes specific to WT livers. (C) as in (A) but of three genes with differential expression between WT and  $\alpha$ 7HMZ livers but no difference in ChIPseq peaks. (D)

RIME results showing proteins involved in signaling pathways uniquely bound to HNF4 $\alpha$  in WT or  $\alpha$ 7HMZ livers at 10:30 AM and 20:30.

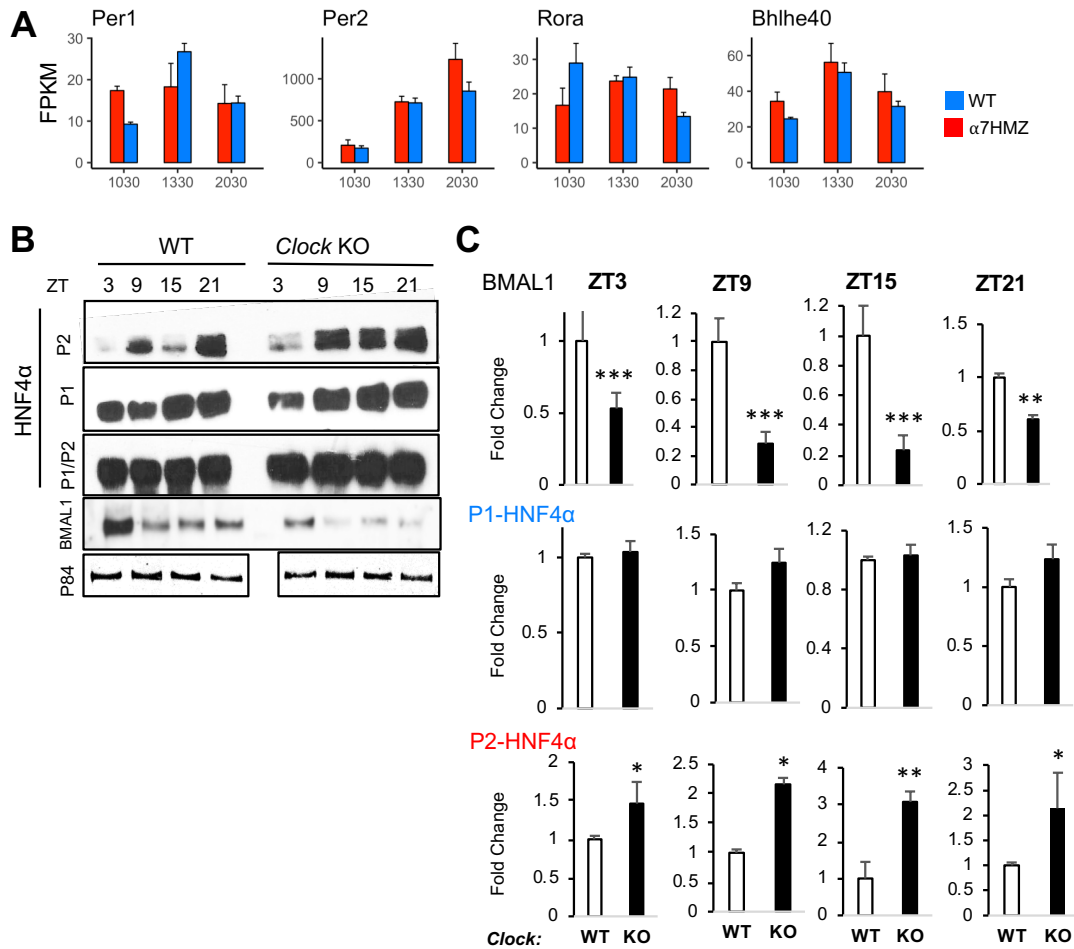

**Figure S5 for Figure 6: HNF4 $\alpha$  isoforms impact the circadian response and are regulated by the clock.**

(A) Barplots of FPKM values for core circadian TFs not significantly dysregulated ( $p_{adj} \geq 0.05$ ) in WT and  $\alpha 7$ HMZ livers. (B) Representative immunoblots showing levels of P1- and P2-HNF4 $\alpha$  protein in WT and *Clock* KO mouse liver whole cell extracts at the indicated time points, using antibodies that recognize either a single isoform (P1 or P2) or both isoforms (P1/P2). Also shown are BMAL1 (*Arntl*) and P84. (C) Quantification of BMAL1, P1-HNF4 $\alpha$  and P2-HNF4 $\alpha$  protein from immunoblots of individual livers ( $n=3-4$ ) from WT and *Clock* KO mice throughout the circadian cycle. \*  $p \leq 0.01$ ; \*\*  $p \leq 0.001$ ; \*\*\*  $p \leq 0.001$  by two-tailed Student's T-test.



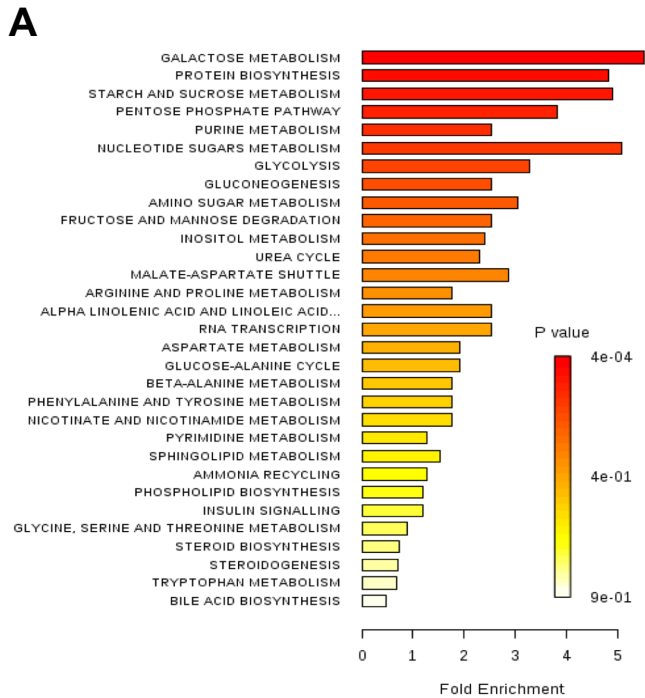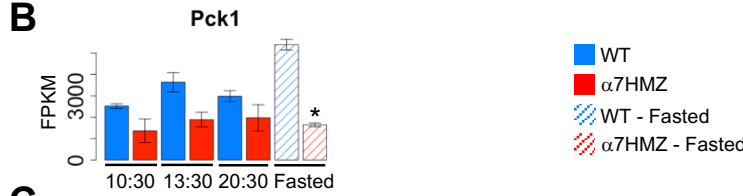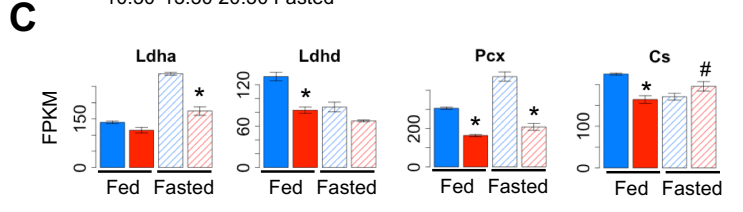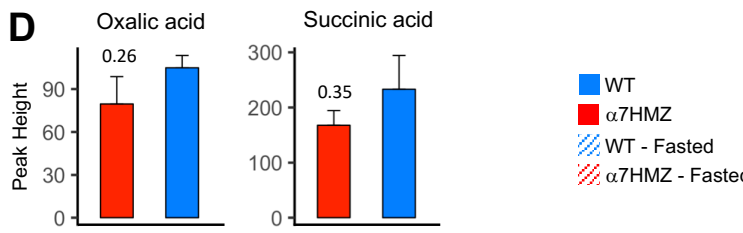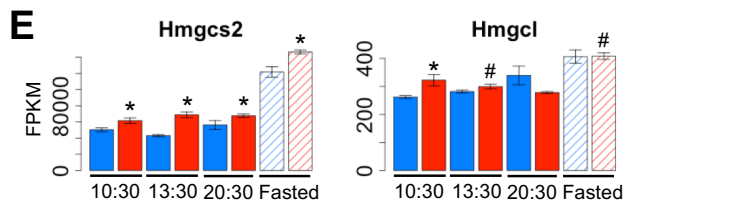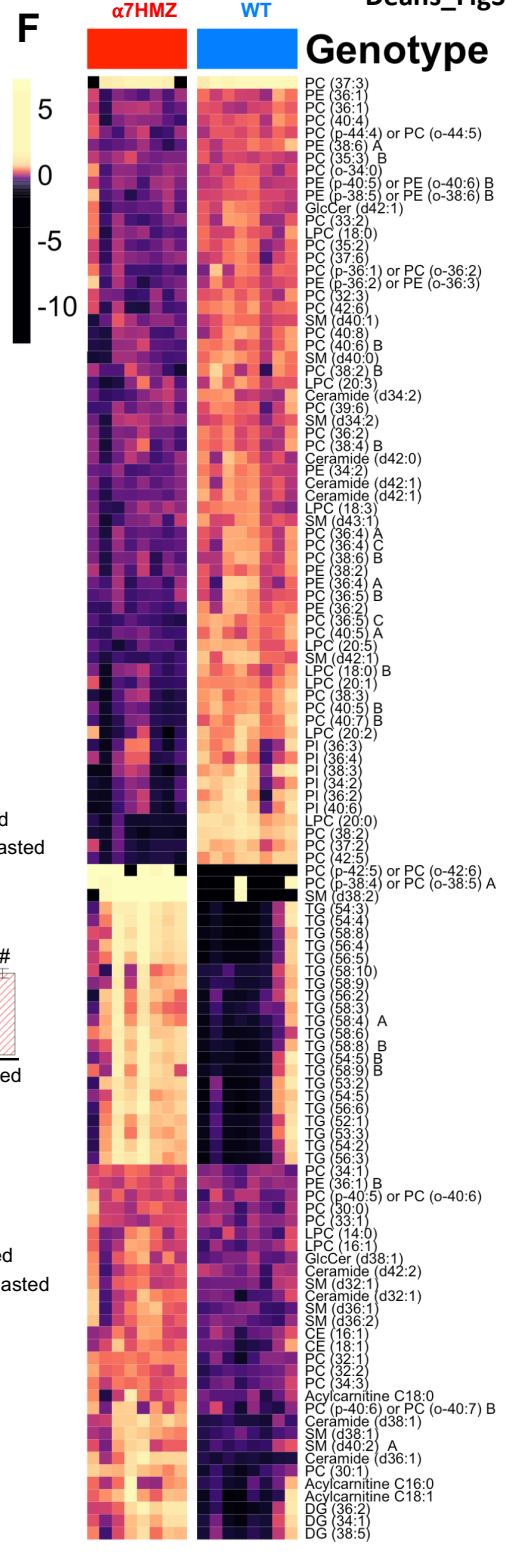

**Figure S6 for Figure 7: Metabolic effects of P2-HNF4 $\alpha$  in the adult liver.**

(A) Pathway enrichment for known primary metabolites dysregulated between WT and  $\alpha$ 7HMZ livers, with a Mann-Whitney U-test  $p \leq 0.05$ . (B,C,E) FPKM values for the indicated genotypes and time points (Fed in C is 10:30 AM) \*  $p_{adj} \leq 0.01$ ; #  $p_{adj} \leq 0.05$ . (D) Bar plots for Krebs cycle metabolites trending towards repression in  $\alpha$ 7HMZ, but not statistically significant. (F) Heatmap of row normalized levels for known complex lipids in WT and  $\alpha$ 7HMZ livers (Benjamini-Hochberg  $p_{adj} \leq 0.05$ ).

**A**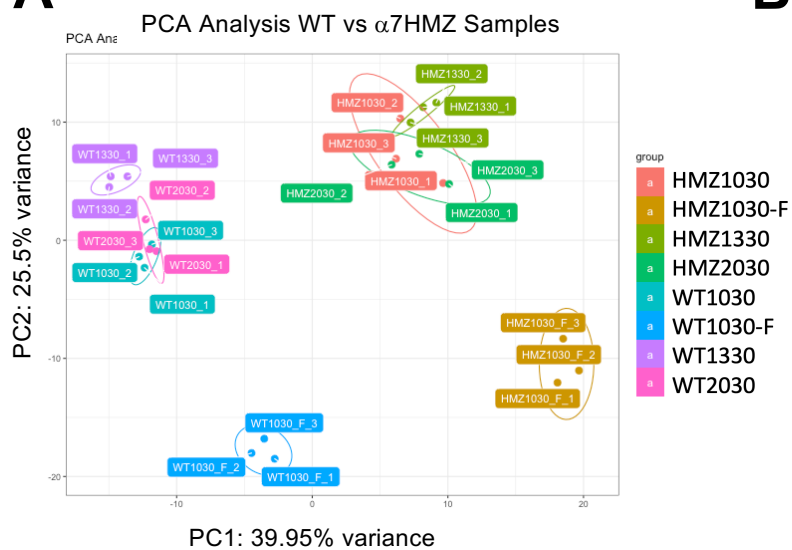**B**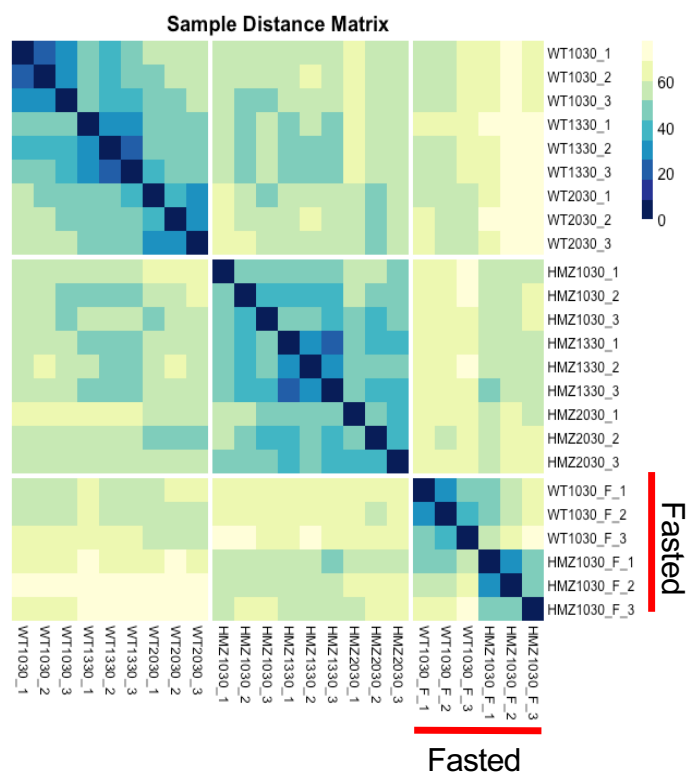**C**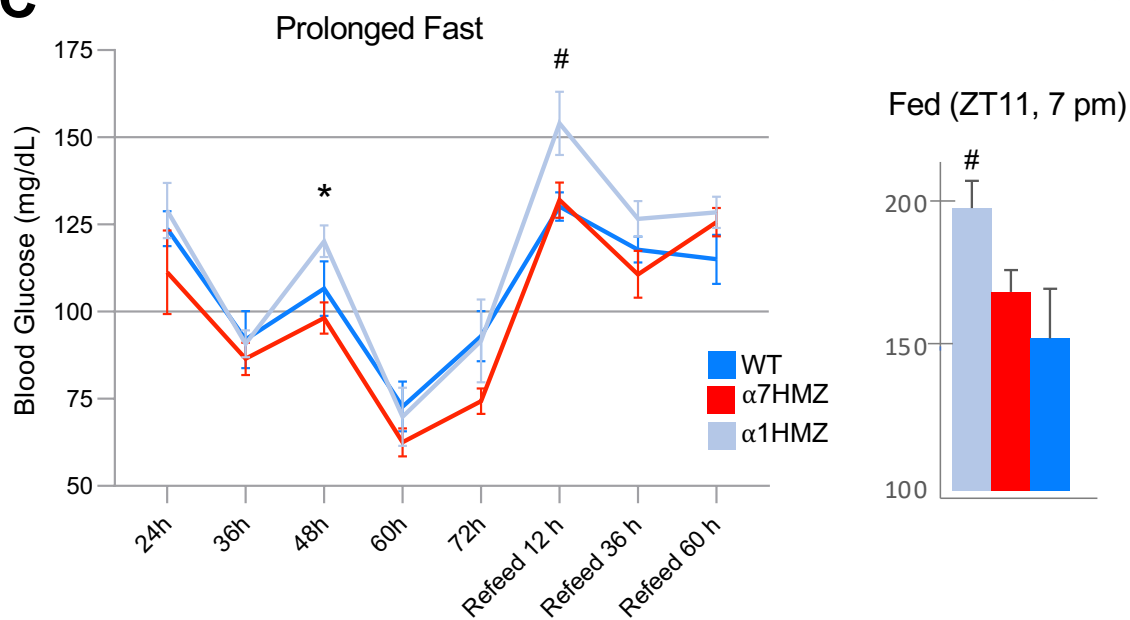**D**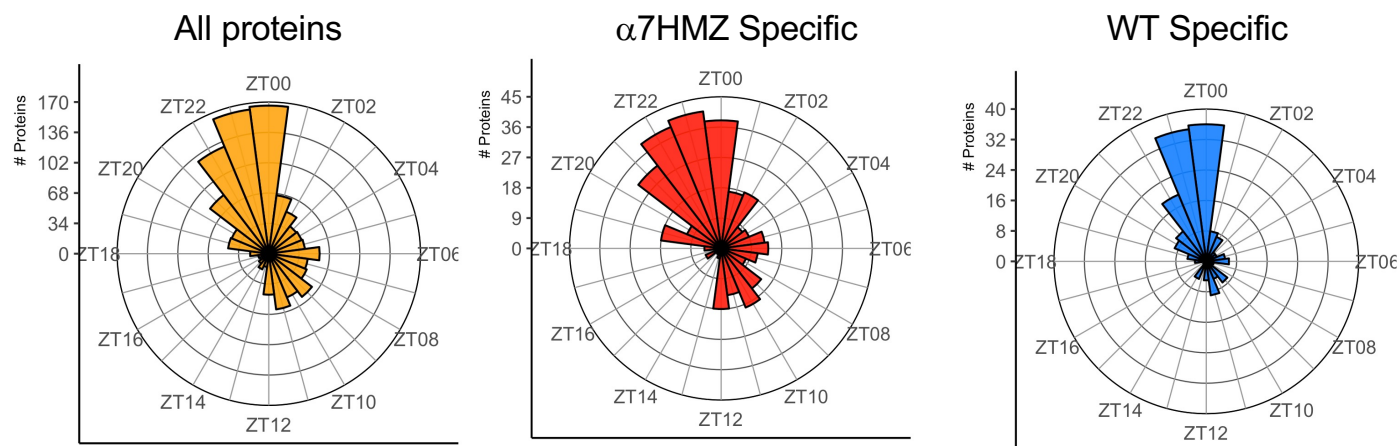

**Figure S7 for Figure 7: PCA and Sample Distance Matrix for all RNA-seq samples.**

(A) PCA analysis of all RNA-seq samples using distance matrix for entire transcriptome.

Biological replicates denoted by underscores and digit, fasting samples denoted by “\_F”. (B)

Sample Distance Matrix for each RNA-seq replicate, including fasting, calculated for entire

transcriptome. Dark blue indicates smaller distance which implies high degree of similarity. (C)

*Left*, circulating blood glucose levels of male mice (~6 mo. old) starting at 24 hr after food was

removed (ZT11). Mice were re-fed after 72 hr of fasting. WT and  $\alpha$ 1HMZ n=5;  $\alpha$ 7HMZ n= 6

for 24, 36 and 48 hr, n=4 for 60 hr, n=3 for remaining time points. #,  $p < 0.05$   $\alpha$ 1HMZ vs. WT; \*

$p < 0.01$   $\alpha$ 1HMZ vs.  $\alpha$ 7HMZ. *Right*, blood glucose levels from fed males (3 to 6 mo. old) at

ZT11. WT n=9,  $\alpha$ 1HMZ n =10,  $\alpha$ 7HMZ n= 7. #,  $p < 0.05$   $\alpha$ 1HMZ versus WT.  $p=0.055$  for

$\alpha$ 1HMZ vs.  $\alpha$ 7HMZ. (D) Rose plots of All Proteins from Robles et al., 2014 (*left*) filtered for

DEGs at any time point (10:30, 13:30, 20:30,  $p_{adj} \leq 0.05$ ) specific for  $\alpha$ 7HMZ (*middle*) or WT

(*right*).
